# Supplementary material for: Clinical characteristics, treatment and prognosis of angiocentric glioma
Source: PubMed Central journal article supplement — Oncol Lett. 2020 Jun 10;20(2):1641–8. doi: 10.3892/ol.2020.11723 (PMC7377082; doi:10.3892/ol.2020.11723), 2020-06-10
Supplement: Supplementary_Data.pdf [file Supplementary_Data.pdf]

Table S1. Summary of 108 reported cases of angiocentric glioma.

| First author (year) | Case no. | Age at surgery (years) | Sex | Symptoms/complaints          | Tumor location            | Surgery | Follow-up (months) | Seizure recurrence | Adjuvant therapy | (Refs.) |
|---------------------|----------|------------------------|-----|------------------------------|---------------------------|---------|--------------------|--------------------|------------------|---------|
| Han (2020)          | 1        | 8                      | M   | Seizures, headache, vomiting | Left temporal lobe        | GTR     | 30                 | No                 | None             | -       |
| Weaver (2017)       | 2        | 16                     | M   | Seizures                     | Right frontal lobe        | GTR     | 18                 | No                 | None             | -       |
|                     | 3        | 6                      | M   | Ataxia                       | Brainstem                 | Biopsy  | 18                 | No                 | None             | (47)    |
|                     | 4        | 5                      | F   | Headache, decreasing vision  | Brainstem                 | STR     | 72                 | No                 | Chemotherapy     | (47)    |
|                     | 5        | 3                      | F   | Faciotplegia                 | Brainstem                 | Biopsy  | 60                 | No                 | Chemotherapy     | (37)    |
| D'Aronco (2017)     | 6        | 7                      | M   | Dysphagia                    | Brainstem                 | Biopsy  | 10                 | No                 | Chemotherapy     | (37)    |
|                     | 7        | 83                     | M   | Hemiplegia                   | Left frontal lobe         | STR     | 6                  | No                 | None             | (45)    |
| Li (2017)           | 8        | 27                     | M   | Seizures                     | Right temporal lobe       | STR     | 3                  | No                 | None             | (51)    |
| Chan (2017)         | 9        | 7                      | M   | Strabismus                   | Brainstem                 | Biopsy  | 1                  | No                 | Chemotherapy     | (34)    |
| McCracken (2016)    | 10       | 16                     | F   | Seizures                     | Left frontal-insular lobe | STR     | 44                 | No                 | R&C              | (42)    |
|                     | 11       | 25                     | M   | Seizures                     | Left frontal lobe         | GTR     | 40                 | No                 | None             | (32)    |
| Adamek (2016)       | 12       | 11                     | F   | Seizures                     | Left frontal lobe         | GTR     | 16                 | No                 | None             | (32)    |
|                     | 13       | 24                     | M   | Seizures                     | Left frontal lobe         | GTR     | 12                 | No                 | None             | (53)    |
| Chatterjee (2016)   | 14       | 22                     | F   | Seizures                     | Right temporal lobe       | GTR     | 6                  | No                 | None             | (35)    |
|                     | 15       | 26                     | F   | Seizures                     | Left temporal lobe        | GTR     | 4                  | No                 | None             | (52)    |
| Feng (2015)         | 16       | 9                      | F   | Seizures                     | Right parietal lobe       | ND      | ND                 | ND                 | ND               | (50)    |
| Sajjad (2015)       | 17       | 40                     | M   | Headache, seizures           | Right parietal lobe       | GTR     | 60                 | No                 | None             | (44)    |
| Tauziède (2015)     | 18       | 11                     | F   | Seizures                     | ND                        | GTR     | 37                 | No                 | None             | (46)    |
| Whitehead (2015)    | 19       | 2                      | F   | Seizures                     | Right frontal lobe        | GTR     | 36                 | No                 | None             | (48)    |
|                     | 20       | 13                     | M   | Seizures                     | Right temporal lobe       | GTR     | 47                 | No                 | None             | (49)    |
| Wu (2015)           | 21       | 17                     | F   | Seizures                     | Left callosum             | GTR     | 27                 | No                 | None             | (49)    |
|                     | 22       | 25                     | F   | Dizziness                    | Right temporal lobe       | GTR     | 24                 | No                 | None             | (49)    |
|                     | 23       | 1.5                    | F   | Seizures                     | Left temporal lobe        | GTR     | 23                 | No                 | None             | (49)    |
|                     | 24       | 16                     | F   | Seizures                     | Left parietal lobe        | GTR     | 21                 | No                 | None             | (49)    |
|                     | 25       | 27                     | M   | Seizures                     | Left temporal lobe        | GTR     | 18                 | No                 | None             | (49)    |
|                     | 26       | 8                      | F   | Seizures                     | Left frontal lobe         | GTR     | 10                 | No                 | None             | (49)    |
| Cheng (2015)        | 27       | 25                     | M   | Seizures                     | Right frontal lobe        | GTR     | 6                  | No                 | None             | (36)    |
| Xu (2015)           | 28       | 22                     | M   | Seizures                     | Right insular lobe        | GTR     | 3                  | No                 | None             | (54)    |
| Keser (2014)        | 29       | 7                      | F   | Seizures                     | Right parietal lob        | GTR     | 12                 | No                 | None             | (41)    |
|                     | 30       | 4.7                    | M   | Seizures                     | Right frontal lobe        | ND      | 1                  | No                 | None             | (43)    |

Table SI. Continued.

| First author (year) | Case no. | Age at surgery (years) | Sex | Symptoms/complaints                         | Tumor location                          | Surgery | Follow-up (months) | Seizure recurrence | Adjuvant therapy | (Refs.) |
|---------------------|----------|------------------------|-----|---------------------------------------------|-----------------------------------------|---------|--------------------|--------------------|------------------|---------|
|                     | 31       | 24                     | M   | Seizures                                    | Right frontal lobe                      | ND      | 2.5                | No                 | None             | (43)    |
|                     | 32       | 5.5                    | F   | Seizures                                    | Right parietal lobe                     | ND      | 30                 | No                 | None             | (43)    |
|                     | 33       | 20                     | F   | Seizures                                    | Left parietal lobe                      | ND      | 40                 | No                 | None             | (43)    |
|                     | 34       | 7                      | M   | Seizures                                    | Left temporal lobe                      | ND      | 48                 | No                 | None             | (43)    |
|                     | 35       | 22.5                   | F   | Seizures                                    | Right frontal lobe                      | ND      | 50                 | No                 | None             | (43)    |
|                     | 36       | 9                      | F   | Seizures                                    | Right parietal lobe                     | ND      | NA                 | No                 | None             | (43)    |
|                     | 37       | 9                      | M   | Seizures                                    | Right frontal lobe                      | ND      | 71                 | No                 | None             | (43)    |
|                     | 38       | 17                     | M   | Seizures                                    | Left temporal lobe                      | ND      | 71                 | No                 | None             | (43)    |
| Ersen (2017)        | 39       | 21                     | M   | Seizures                                    | Left frontal lobe                       | GTR     | 48                 | No                 | None             | (38)    |
| Grajkowska (2014)   | 40       | 14                     | M   | Seizures                                    | Left occipitoparietal lobe              | GTR     | 48                 | No                 | None             | (39)    |
|                     | 41       | 15                     | F   | Seizures                                    | Right temporal lobe                     | GTR     | 48                 | No                 | None             | (39)    |
| Kakkar (2014)       | 42       | 18                     | M   | Seizures                                    | Left frontal lobe                       | GTR     | 12                 | No                 | None             | (40)    |
| Alexandru (2013)    | 43       | 12                     | F   | Seizures                                    | Left frontal lobe                       | GTR     | 3                  | No                 | None             | (8)     |
| Buccoliero (2013)   | 44       | 2                      | F   | Seizures                                    | Left temporo-parietal-insular lobe      | STR     | 84                 | Yes                | None             | (15)    |
|                     | 45       | 11                     | F   | Seizures                                    | Left occipitoparietal lobe              | STR     | 2                  | No                 | None             | (15)    |
|                     | 46       | 10                     | M   | Seizures                                    | Left frontal lobe                       | GTR     | 16                 | No                 | None             | (15)    |
| Aguilar (2012)      | 47       | 15                     | M   | Weakness, numbness of the left side of body | Right frontal lobe                      | GTR     | 6                  | No                 | Radiation        | (17)    |
| Qi (2012)           | 48       | 22                     | M   | Seizures                                    | Left amygdaloid nucleus                 | GTR     | 14                 | No                 | None             | (18)    |
|                     | 49       | 14                     | M   | Seizures                                    | Right temporal lobe                     | GTR     | 3                  | No                 | None             | (18)    |
| Raghunathan (2012)  | 50       | 3                      | M   | ND                                          | Right occipitoparietal lobe             | ND      | ND                 | ND                 | ND               | (24)    |
|                     | 51       | 5                      | M   | ND                                          | Right frontal lobe                      | ND      | ND                 | ND                 | ND               | (24)    |
|                     | 52       | 15                     | M   | ND                                          | Left frontal lobe                       | ND      | ND                 | ND                 | ND               | (24)    |
| Li (2012)           | 53       | 4                      | M   | Seizures                                    | Left frontal lobe                       | GTR     | 42                 | No                 | None             | (23)    |
|                     | 54       | 4                      | F   | Seizures                                    | Right frontal lobe                      | GTR     | 72                 | No                 | None             | (23)    |
|                     | 55       | 9                      | M   | Seizures                                    | Right temporal lobe                     | GTR     | 108                | No                 | None             | (23)    |
| Miyata (2012)       | 56       | 54                     | F   | Seizures                                    | Left hippocampus, amygdaloid nucleus    | GTR     | 50                 | No                 | None             | (30)    |
|                     | 57       | 37                     | M   | Seizures                                    | Left uncinate gyrus, amygdaloid nucleus | GTR     | 11                 | No                 | None             | (30)    |
| Koral (2012)        | 58       | 4                      | M   | Seizures                                    | Right temporal lobe                     | STR     | 12                 | No                 | None             | (29)    |
| Rho (2011)          | 59       | 10                     | F   | Dizziness, otalgia                          | Right medial frontal cortex             | GTR     | 9                  | No                 | None             | (9)     |
| Wu (2012)           | 60       | 7                      | F   | Seizures                                    | Right parietal lobe                     | GTR     | 6                  | No                 | None             | (20)    |

Table SI. Continued.

| First author (year) | Case no. | Age at surgery (years) | Sex | Symptoms/complaints                   | Tumor location                | Surgery | Follow-up (months) | Seizure recurrence | Adjuvant therapy | (Refs.) |
|---------------------|----------|------------------------|-----|---------------------------------------|-------------------------------|---------|--------------------|--------------------|------------------|---------|
| Miyahara (2011)     | 61       | 66                     | F   | Seizures                              | Right temporal-insular lobe   | STR     | 12                 | No                 | R&C              | (25)    |
| Marburger (2011)    | 62       | 10                     | F   | Seizures                              | Left occipitoparietal lobe    | GTR     | 131                | No                 | None             | (7)     |
|                     | 63       | 15                     | M   | Seizures, headache, decreasing vision | Left temporal lobe            | STR     | 103                | Yes                | None             | (7)     |
|                     | 64       | 19                     | M   | Seizures                              | Left parietal lobe            | GTR     | 44                 | No                 | None             | (7)     |
|                     | 65       | 3                      | F   | Seizures                              | Left temporal lobe            | GTR     | 27                 | No                 | None             | (7)     |
|                     | 66       | 15                     | M   | Headache, decreasing vision           | Right thalamus                | Biopsy  | 17                 | No                 | None             | (7)     |
| Takada (2011)       | 67       | 26                     | M   | Seizures                              | Right frontal lobe            | GTR     | 12                 | No                 | None             | (26)    |
| Pokharel (2011)     | 68       | 3                      | M   | Seizures                              | Parietal lobe                 | GTR     | 10                 | No                 | None             | (27)    |
| Hu (2010)           | 69       | 19                     | M   | Dizziness                             | Left frontal lobe             | GTR     | 8                  | No                 | None             | (19)    |
| Rosenzweig (2010)   | 70       | 28                     | M   | Seizures                              | Left temporal lobe            | STR     | 24                 | No                 | None             | (28)    |
| Mott (2009)         | 71       | 57                     | F   | Headache                              | Right frontal lobe            | Biopsy  | 5                  | No                 | Radiation        | (6)     |
| Varikatt (2009)     | 72       | 16                     | F   | Seizures                              | Occipitoparietal lobe         | GTR     | ND                 | ND                 | Radiation        | (31)    |
| Fulton (2009)       | 73       | 2                      | M   | Seizures                              | Right frontoparietal lobe     | STR     | 14                 | No                 | None             | (10)    |
| Covington (2009)    | 74       | 5                      | F   | Ataxia                                | Brainstem                     | STR     | 24                 | No                 | None             | (11)    |
| Shakur (2009)       | 75       | 10                     | M   | Headache, decreasing vision           | Left posterior temporal lobe  | GTR     | 24                 | No                 | None             | (12)    |
|                     | 76       | 10                     | M   | Seizures                              | Left middle temporal lobe     | GTR     | 9                  | No                 | None             | (12)    |
|                     | 77       | 13                     | F   | Seizures                              | Left anterior temporal lobe   | GTR     | 6                  | No                 | None             | (12)    |
| Ma (2010)           | 78       | 25                     | F   | Seizures                              | Hippocampus                   | GTR     | 3                  | No                 | None             | (22)    |
| Sun (2009)          | 79       | 9                      | M   | Seizures                              | Non-temporal lobe             | ND      | ND                 | ND                 | ND               | (21)    |
| Sugita (2008)       | 80       | 6                      | M   | Seizures                              | Right occipitoparietal lobe   | GTR     | 9                  | No                 | None             | (13)    |
| Arsene (2008)       | 81       | 20                     | M   | Seizures                              | Right temporal lobe           | GTR     | 2                  | No                 | None             | (16)    |
|                     | 82       | 55                     | M   | Headache                              | Right temporal lobe           | GTR     | 0.25               | No                 | None             | (16)    |
| Preusser (2007)     | 83       | 6                      | M   | Seizures                              | Medial temporal lobe          | STR     | 60                 | No                 | None             | (14)    |
|                     | 84       | 9                      | F   | Seizures                              | Medial inferior temporal lobe | STR     | 60                 | No                 | None             | (14)    |
|                     | 85       | 15                     | M   | Seizures                              | Precuneus                     | STR     | 60                 | No                 | None             | (14)    |
|                     | 86       | 15                     | F   | Seizures                              | Precuneus                     | STR     | 7                  | No                 | Radiation        | (14)    |
|                     | 87       | 17                     | M   | Seizures                              | Frontoparietal lobe           | Biopsy  | 24                 | No                 | Radiation        | (14)    |
|                     | 88       | 35                     | M   | Seizures                              | Parietal lobe                 | STR     | 6                  | No                 | None             | (14)    |
|                     | 89       | 37                     | F   | Seizures                              | Hippocampus                   | STR     | 12                 | No                 | None             | (14)    |
|                     | 90       | 70                     | F   | Seizures                              | Hippocampus                   | STR     | 83                 | No                 | None             | (14)    |
| Lellouch (2005)     | 91       | 6.5                    | M   | Seizures                              | Left frontoparietal lobe      | GTR     | 168                | No                 | None             | (1)     |

Table S1. Continued.

| First author (year) | Case no. | Age at surgery (years) | Sex | Symptoms/complaints | Tumor location              | Surgery | Follow-up (months) | Seizure recurrence | Adjuvant therapy | (Refs.) |
|---------------------|----------|------------------------|-----|---------------------|-----------------------------|---------|--------------------|--------------------|------------------|---------|
|                     | 92       | 2                      | M   | Seizures            | Right frontoparietal lobe   | STR     | 36                 | Yes                | None             | (1)     |
|                     | 93       | 4                      | F   | Seizures            | Left temporal lobe          | GTR     | 72                 | No                 | None             | (1)     |
|                     | 94       | 4.5                    | M   | Seizures            | Right parietal lobe         | GTR     | 60                 | No                 | None             | (1)     |
|                     | 95       | 9.5                    | F   | Seizures            | Left frontal lobe           | GTR     | 2.3                | No                 | None             | (1)     |
|                     | 96       | 13                     | F   | Seizures            | Right frontal lobe          | STR     | 24                 | Yes                | None             | (1)     |
|                     | 97       | 12                     | M   | Seizures            | Right parietal lobe         | GTR     | 24                 | No                 | None             | (1)     |
|                     | 98       | 3                      | F   | Seizures            | Left frontal lobe           | STR     | 14                 | Yes                | None             | (1)     |
|                     | 99       | 10                     | M   | Seizures            | Left frontal lobe           | STR     | 12                 | Yes                | None             | (1)     |
|                     | 100      | 4                      | F   | Seizures            | Left frontal lobe           | GTR     | 72                 | No                 | None             | (1)     |
| Wang (2005)         | 101      | 15                     | F   | Seizures            | Right temporal lobe         | GTR     | 12                 | No                 | None             | (2)     |
|                     | 102      | 4                      | F   | Seizures            | Right parietal lobe         | GTR     | 48                 | No                 | None             | (2)     |
|                     | 103      | 3                      | M   | Seizures            | Left parietal lobe          | STR     | 36                 | No                 | None             | (2)     |
|                     | 104      | 14                     | M   | Seizures            | Right inferior frontal lobe | GTR     | 24                 | No                 | None             | (2)     |
|                     | 105      | 12                     | F   | Seizures            | Left inferior frontal lobe  | STR     | 24                 | No                 | None             | (2)     |
|                     | 106      | 30                     | F   | Seizures            | Left temporal lobe          | GTR     | 48                 | No                 | None             | (2)     |
|                     | 107      | 26                     | M   | Seizures            | Left frontal lobe           | STR     | 68                 | No                 | R&C              | (2)     |
|                     | 108      | 37                     | M   | Seizures            | Right frontal lobe          | GTR     | ND                 | No                 | None             | (2)     |

R&C, radiation and chemotherapy; ND, not described; GTR, gross total resection; STR, subtotal resection; M, male; F, female.
